# Supplementary material
Source: MDPI journal article supplement (https://www.mdpi.com/2673-4133/5/1/5)
Supplement: s1 [file s1]

# Supplementary

## Contents

[Table S1](#) Phytoplankton candidate parameters.

[Table S2](#) Zooplankton candidate parameters.

[Table S3](#) List of phytoplankton species.

[Table S4](#) List of zooplankton species.

[Table S5](#) Results of water quality survey in wet season.

[Table S6](#) Results of water quality survey in dry season.

[Figure S1](#) Box plot analysis during the wet season.

[Figure S2](#) Box plot analysis during the dry season.

Table S1 Phytoplankton candidate parameters.

| category              | Parameter number | biological parameters                 | Anticipated response to disturbance |
|-----------------------|------------------|---------------------------------------|-------------------------------------|
| community richness    | M1               | Number of phytoplankton taxa          | ↓                                   |
|                       | M2               | Total number of phytoplankton species | ↓                                   |
|                       | M3               | Total number of nondiatom species     | ↓                                   |
|                       | M4               | Number of cyanobacteria species       | ↑                                   |
|                       | M5               | Number of green algal species         | ↓                                   |
|                       | M6               | Number of diatom species              | ↓                                   |
|                       | M7               | Shannon diversity index               | ↓                                   |
|                       | M8               | Margalef richness index               | ↓                                   |
| community abundance   | M9               | Total phytoplankton density           | ↓                                   |
|                       | M10              | Diatom density                        | ↓                                   |
|                       | M11              | Density of cyanobacteria              | ↑                                   |
|                       | M12              | Density of green algae                | ↓                                   |
|                       | M13              | Cryptophyta density                   | ↓                                   |
|                       | M14              | Cyanobacterial biomass                | ↓                                   |
|                       | M15              | Chlorophyta biomass                   | ↓                                   |
|                       | M16              | Bacillary biomass                     | ↓                                   |
|                       | M17              | Cryptophyta biomass                   | ↓                                   |
| community composition | M18              | Pielou uniformity index               | ↓                                   |
|                       | M19              | Proportion of dominant species %      | ↑                                   |
|                       | M20              | The top 3 dominant species account %  | ↑                                   |
|                       | M21              | Taxon individual density mean         | ↓                                   |
|                       | M22              | Cyanobacteria density %               | ↑                                   |
|                       | M23              | Green algae density %                 | ↑                                   |
|                       | M24              | Diatom density %                      | ↓                                   |
|                       | M25              | Cryptoalgae density %                 | ↓                                   |
|                       | M26              | Cyanobacteria + green algae density % | ↑                                   |
|                       | M27              | Green algae + diatom density %        | ↓                                   |
|                       | M28              | Total phytoplankton biomass           | ↓                                   |
|                       | M29              | Cyanobacteria biomass %               | ↑                                   |
|                       | M30              | Chlorophyta biomass %                 | ↓                                   |
|                       | M31              | Diatom biomass %                      | ↓                                   |
|                       | M32              | Cryptophyta biomass %                 | ↓                                   |
| stain resistance      | M33              | pollution tolerant diatoms            | ↑                                   |
|                       | M34              | Bloom algae density %                 | ↑                                   |
|                       | M35              | Toxin-producing algae density %       | ↑                                   |

Table S2 Zooplankton candidate parameters.

| category              | serial number | Candidate indicators                                   | Anticipated response to disturbance |
|-----------------------|---------------|--------------------------------------------------------|-------------------------------------|
| community richness    | Z1            | Total number of zooplankton species                    | ↓                                   |
|                       | Z2            | Number of protozoan species                            | ↓                                   |
|                       | Z3            | Number of rotifer species                              | ↑                                   |
|                       | Z4            | Number of cladoceran species                           | ↓                                   |
|                       | Z5            | Number of copepod species                              | ↓                                   |
|                       | Z6            | Shannon diversity index                                | ↓                                   |
|                       | Z7            | Margalef richness index                                | ↓                                   |
| community abundance   | Z8            | Total zooplankton density                              | ↓                                   |
|                       | Z9            | protozoa density                                       | ↓                                   |
|                       | Z10           | Rotifer density                                        | ↑                                   |
|                       | Z11           | Cladocera density                                      | ↓                                   |
|                       | Z12           | Copepod density                                        | ↓                                   |
|                       | Z13           | Total zooplankton biomass                              | ↓                                   |
|                       | Z14           | Protozoan biomass                                      | ↓                                   |
|                       | Z15           | Rotifer biomass                                        | ↑                                   |
|                       | Z16           | Cladocera biomass                                      | ↓                                   |
|                       | Z17           | Copepod biomass                                        | ↓                                   |
|                       | Z18           | The sum of the densities of the top 3 Dominant species | ↑                                   |
| community composition | Z19           | Protozoa density %                                     | ↓                                   |
|                       | Z20           | Rotifer density %                                      | ↑                                   |
|                       | Z21           | proportion of cladocerans %                            | ↓                                   |
|                       | Z22           | Copepod density proportion %                           | ↓                                   |
|                       | Z23           | Protozoan biomass %                                    | ↓                                   |
|                       | Z24           | Rotifer biomass %                                      | ↑                                   |
|                       | Z25           | Cladocera biomass %                                    | ↓                                   |
|                       | Z26           | Copepod biomass %                                      | ↓                                   |
|                       | Z27           | Pielou uniformity index                                | ↓                                   |
|                       | Z28           | Proportion of dominant species %                       | ↑                                   |
|                       | Z29           | The top 3 dominant species account %                   | ↑                                   |
| Nutritional structure | Z30           | Filter feeders %                                       | ↓                                   |
|                       | Z31           | Protozoan predators%                                   | ↓                                   |
|                       | Z32           | Rotifer filter feeders%                                | ↑                                   |
|                       | Z33           | Rotifer predators%                                     | ↑                                   |
|                       | Z34           | Small zooplankton filter feeders%                      | ↓                                   |
|                       | Z35           | Small zooplankton predators%                           | ↓                                   |
|                       | Z36           | Medium-sized zooplankton filter feeders%               | ↓                                   |
|                       | Z37           | Meso zooplankton predators%                            | ↓                                   |
|                       | Z38           | Large zooplankton filter feeders%                      | ↓                                   |
|                       | Z39           | Large zooplankton predators%                           | ↓                                   |

Table S3 List of phytoplankton species.

| groups          | specie                                              |
|-----------------|-----------------------------------------------------|
| Cyanophyta      | <i>Chroococcus minor</i>                            |
|                 | <i>Microcystis aeruginosa</i>                       |
|                 | <i>Dactylococcopsis raphidioides</i>                |
|                 | <i>Dactylococcopsis raphidioides f. falciformis</i> |
|                 | <i>Oscillatoria tenuis</i>                          |
|                 | <i>Oscillatoria amphibian</i>                       |
|                 | <i>Nostoc planctonicum</i>                          |
|                 | <i>Anabaena azotica</i>                             |
|                 | <i>Planktothrix agardhii</i>                        |
|                 | <i>Anabaena flosaquae</i>                           |
|                 | <i>Gloeocapsa sp.</i>                               |
|                 | <i>Chroococcus limneticus</i>                       |
| Bacillariophyta | <i>Pseudanabaena sp.</i>                            |
|                 | <i>Melosira granulata var. angustissima</i>         |
|                 | <i>Melosira varians</i>                             |
|                 | <i>Asterionella formosa</i>                         |
|                 | <i>Cyclotella meneghiniana</i>                      |
|                 | <i>Cyclotella striata</i>                           |
|                 | <i>Synedra var. radians</i>                         |
|                 | <i>Cocconeis diminuta Pantocsek</i>                 |
|                 | <i>Achnanthes sp.</i>                               |
|                 | <i>Achnanthes exigua var. exigua</i>                |
|                 | <i>Achnanthes minutissima var. cryptocephala</i>    |
|                 | <i>Navicula hasta</i>                               |
|                 | <i>Gyrosigma attenuatum</i>                         |
|                 | <i>Cyclotella stelligera</i>                        |
|                 | <i>Fragilaria crotonensis</i>                       |
|                 | <i>Navicula cari</i>                                |
|                 | <i>Cymbella pusilla</i>                             |
|                 | <i>Cymbella perpusilla</i>                          |
|                 | <i>Nitzschia capitellata</i>                        |
| Chrysophyta     | <i>Dinobryon divergens</i>                          |
| Cryptophyta     | <i>Chroomonas acuta</i>                             |
|                 | <i>Cryptomonas erosa</i>                            |
|                 | <i>Cryptomonas rostrata</i>                         |
|                 | <i>Cryptomonas ouata</i>                            |
|                 | <i>Cryptomonas marssonii</i>                        |
| Pyrrophyta      | <i>Ceratium sp.</i>                                 |
|                 | <i>Ceratium hirundinella</i>                        |
| Euglenophyta    | <i>Euglena sp.</i>                                  |
|                 | <i>Phacus sp.</i>                                   |
|                 | <i>Trachelomonas sp.</i>                            |
|                 | <i>Trachelomonas curta</i>                          |

| groups      | specie                                                         |
|-------------|----------------------------------------------------------------|
| Chlorophyta | <i>Eudorina</i> sp.                                            |
|             | <i>Pandorina morum</i>                                         |
|             | <i>Chlorella vulgaris</i>                                      |
|             | <i>Coelastrum microporum</i>                                   |
|             | <i>Coelastrum microporum</i>                                   |
|             | <i>Ankistrodesmus angustus</i>                                 |
|             | <i>Ankistrodesmus acicularis</i>                               |
|             | <i>Scenedesmus</i> sp.                                         |
|             | <i>Scenedesmus quadricauda</i>                                 |
|             | <i>Scenedesmus quadricauda</i> var <i>parvus</i>               |
|             | <i>Scenedesmus arcuatus</i>                                    |
|             | <i>Scenedesmus platydiscus</i>                                 |
|             | <i>Krichneriella obesa</i>                                     |
|             | <i>Closterium venus</i>                                        |
|             | <i>Closterium parvulum</i>                                     |
|             | <i>Closterium gracile</i>                                      |
|             | <i>Closterium diana</i>                                        |
|             | <i>Closterium kützingii</i> Breb                               |
|             | <i>Pediastrum simplex</i>                                      |
|             | <i>Pediastrum biradiatum</i>                                   |
|             | <i>Pediastrum boryanum</i>                                     |
|             | <i>Pediastrum integrum</i>                                     |
|             | <i>Pediastrum duplex</i> var. <i>gracillimum</i> W.et.G.S West |
|             | <i>Pediastrum simplex</i> var.                                 |
|             | <i>Oocystis borgei</i>                                         |
|             | <i>Oocystis elliptica</i>                                      |
|             | <i>Golenkinia paucispina</i>                                   |
|             | <i>Hormidium subtile</i>                                       |
|             | <i>Staurostrum planctonicum</i>                                |
|             | <i>Quadrigula chodatii</i>                                     |
|             | <i>Characium limneticum</i>                                    |
|             | <i>Dictyosphaerium ehrenbergianum</i>                          |
|             | <i>Hormidium flacidum</i>                                      |
|             | <i>Coelastrum proboscideum</i>                                 |
|             | <i>Actinastrum hantzschii</i>                                  |
|             | <i>Westella botryoides</i>                                     |
|             | <i>Monographidium circinale</i>                                |
|             | <i>Crucigenia fenestrata</i>                                   |
|             | <i>Ankistrodesmus falcatus</i>                                 |
|             | <i>Quadrigula lawstris</i>                                     |

Table S4 List of zooplankton species.

| group           | specie                                |
|-----------------|---------------------------------------|
| Phylum Protozoa | <i>Diffugia corona</i>                |
|                 | <i>Vorticellidae</i>                  |
| Rotifera        | <i>Brachionus calyciflorus</i> Pallas |
|                 | <i>Keratella cochlearis</i>           |
|                 | <i>Keratella quadrata</i>             |
|                 | <i>Polyarthra trigla</i>              |
|                 | <i>Filinia longisela</i>              |
|                 | <i>Brachionus angularis</i>           |
|                 | <i>Brachionus urceus</i>              |
|                 | <i>Brachionus forficula</i>           |
|                 | <i>Trichocerca pusilla</i>            |
|                 | <i>Asplanchna</i> sp.                 |
|                 | <i>Pompholyx complanata</i>           |
| Cladocera       | <i>Daphnia hyalina</i>                |
|                 | <i>Diaphanosoma hrachyurum</i>        |
|                 | <i>Diaphanosoma leuchtenbergianum</i> |
|                 | <i>Bosmina longirostris</i>           |
|                 | <i>Chydorus sphaericus</i>            |
|                 | <i>Alona rectangula</i>               |
|                 | <i>Alona guttata</i>                  |
|                 | <i>Alona quadrangularis</i>           |
| Copepoda        | <i>Daphnia cucullata</i>              |
|                 | <i>Nauplius larva</i>                 |
|                 | <i>Copepodite</i>                     |
|                 | <i>Cyclops</i>                        |
|                 | <i>Eucyclops serrulatus</i>           |
|                 | <i>Thermocyclops dybowskii</i>        |
|                 | <i>Sinodiaptomus</i> sp.              |
|                 | <i>Calanus sinicus</i>                |
|                 | <i>Cyclops strennus</i>               |
|                 | <i>incongruens</i>                    |

Table S5 Results of water quality survey in wet season.

| site | WT(°C) | pH   | DO(mg/L) | EC(μs/cm) | ORP(mV) | SD(cm) | SS(g/L) | CODMn(mg/L) | COD(mg/L) | TN(mg/L) | NH4+-N(mg/L) | TOC(mg/L) | TP(mg/L) |
|------|--------|------|----------|-----------|---------|--------|---------|-------------|-----------|----------|--------------|-----------|----------|
| S1   | 23.8   | 8.66 | 8.38     | 596       | 77.5    | 0.47   | 0.036   | 3.77        | 53.00     | 0.35     | 0.28         | 7.84      | 0.045    |
| S2   | 25.3   | 9.13 | 11.38    | 460       | 98.6    | 0.41   | 0.035   | 3.89        | 57.44     | 0.27     | 0.26         | 8.22      | 0.028    |
| S3   | 22.3   | 8.46 | 7.39     | 492       | 85.3    | 0.52   | 0.032   | 4.37        | 47.44     | 1.47     | 0.18         | 8.02      | 0.042    |
| S4   | 24.1   | 8.79 | 9.01     | 475       | 84.7    | 0.42   | 0.034   | 5.41        | 64.11     | 3.02     | 0.45         | 8.47      | 0.061    |
| S5   | 22.9   | 8.45 | 7.04     | 489       | 86.7    | 0.59   | 0.037   | 4.57        | 52.63     | 1.93     | 0.38         | 8.02      | 0.036    |
| S6   | 25.1   | 9.18 | 11.71    | 472       | 102.4   | 0.43   | 0.039   | 5.17        | 55.59     | 2.03     | 0.39         | 8.33      | 0.044    |
| S7   | 25.2   | 9.05 | 10.05    | 494       | 93.8    | 0.58   | 0.057   | 3.89        | 57.81     | 2.16     | 0.28         | 8.88      | 0.048    |
| S8   | 24.3   | 8.75 | 8.72     | 478       | 92.9    | 0.44   | 0.050   | 3.45        | 56.70     | 1.82     | 0.20         | 8.05      | 0.037    |
| S9   | 25.1   | 8.74 | 8.59     | 609       | 100.3   | 0.56   | 0.033   | 3.17        | 57.44     | 1.94     | 0.41         | 7.85      | 0.045    |
| S10  | 24.6   | 8.69 | 8.13     | 483       | 104.5   | 0.32   | 0.047   | 3.97        | 58.93     | 1.52     | 0.32         | 7.96      | 0.049    |
| S11  | 23.4   | 8.94 | 10.42    | 729       | 95.9    | 0.49   | 0.010   | 4.41        | 50.78     | 1.41     | 0.28         | 8.77      | 0.034    |

Table S6 Results of water quality survey in dry season.

| site | WT(°C) | pH   | DO(mg/L) | EC(μs/cm) | ORP(mV) | SD(cm) | SS(g/L) | CODMn(mg/L) | COD(mg/L) | TN(mg/L) | NH4+-N(mg/L) | TOC(mg/L) | TP(mg/L) |
|------|--------|------|----------|-----------|---------|--------|---------|-------------|-----------|----------|--------------|-----------|----------|
| S1   | 12.8   | 8.28 | 8.81     | 753       | 145.1   | 0.90   | 0.002   | 2.17        | 28.37     | 2.05     | 0.16         | 7.46      | 0.037    |
| S2   | 14.3   | 8.83 | 9.53     | 714       | 290.1   | 1.05   | 0.004   | 3.69        | 25.78     | 1.74     | 0.28         | 6.64      | 0.023    |
| S3   | 12.7   | 8.28 | 8.81     | 734       | 185.8   | 1.10   | 0.005   | 3.73        | 33.56     | 1.77     | 0.34         | 6.18      | 0.017    |
| S4   | 13.4   | 8.50 | 8.83     | 721       | 227.3   | 1.20   | 0.016   | 3.49        | 21.33     | 1.57     | 0.17         | 6.42      | 0.046    |
| S5   | 13.1   | 8.37 | 8.68     | 723       | 225.3   | 1.25   | 0.006   | 4.17        | 20.59     | 1.16     | 0.16         | 5.81      | 0.030    |
| S6   | 14.1   | 7.97 | 9.14     | 715       | 287.4   | 1.10   | 0.021   | 4.41        | 26.15     | 1.77     | 0.15         | 6.72      | 0.027    |
| S7   | 13.5   | 8.76 | 8.90     | 716       | 228.5   | 1.30   | 0.023   | 3.93        | 19.85     | 1.62     | 0.12         | 8.01      | 0.028    |
| S8   | 13.7   | 8.54 | 9.00     | 720       | 227.8   | 1.25   | 0.021   | 4.09        | 21.33     | 1.67     | 0.05         | 6.59      | 0.020    |
| S9   | 13.6   | 8.50 | 8.74     | 717       | 237.8   | 1.20   | 0.022   | 4.05        | 16.52     | 1.59     | 0.30         | 6.58      | 0.039    |
| S10  | 13.7   | 8.39 | 8.26     | 724       | 156.1   | 1.05   | 0.023   | 3.65        | 18.00     | 1.58     | 0.10         | 6.58      | 0.020    |
| S11  | 13.4   | 8.70 | 8.92     | 716       | 218.4   | 1.40   | 0.017   | 3.81        | 15.41     | 1.44     | 0.16         | 6.71      | 0.031    |

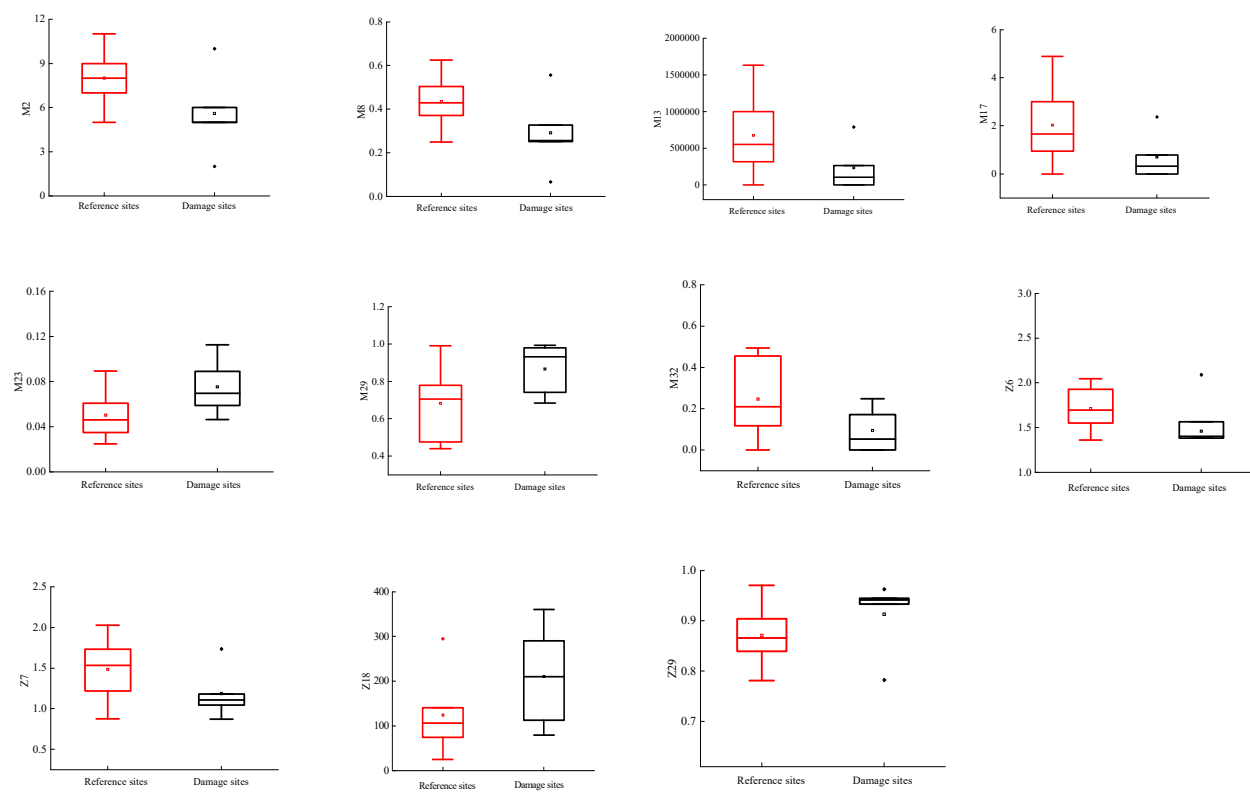

Figure S1 Box plot analysis during the wet season.



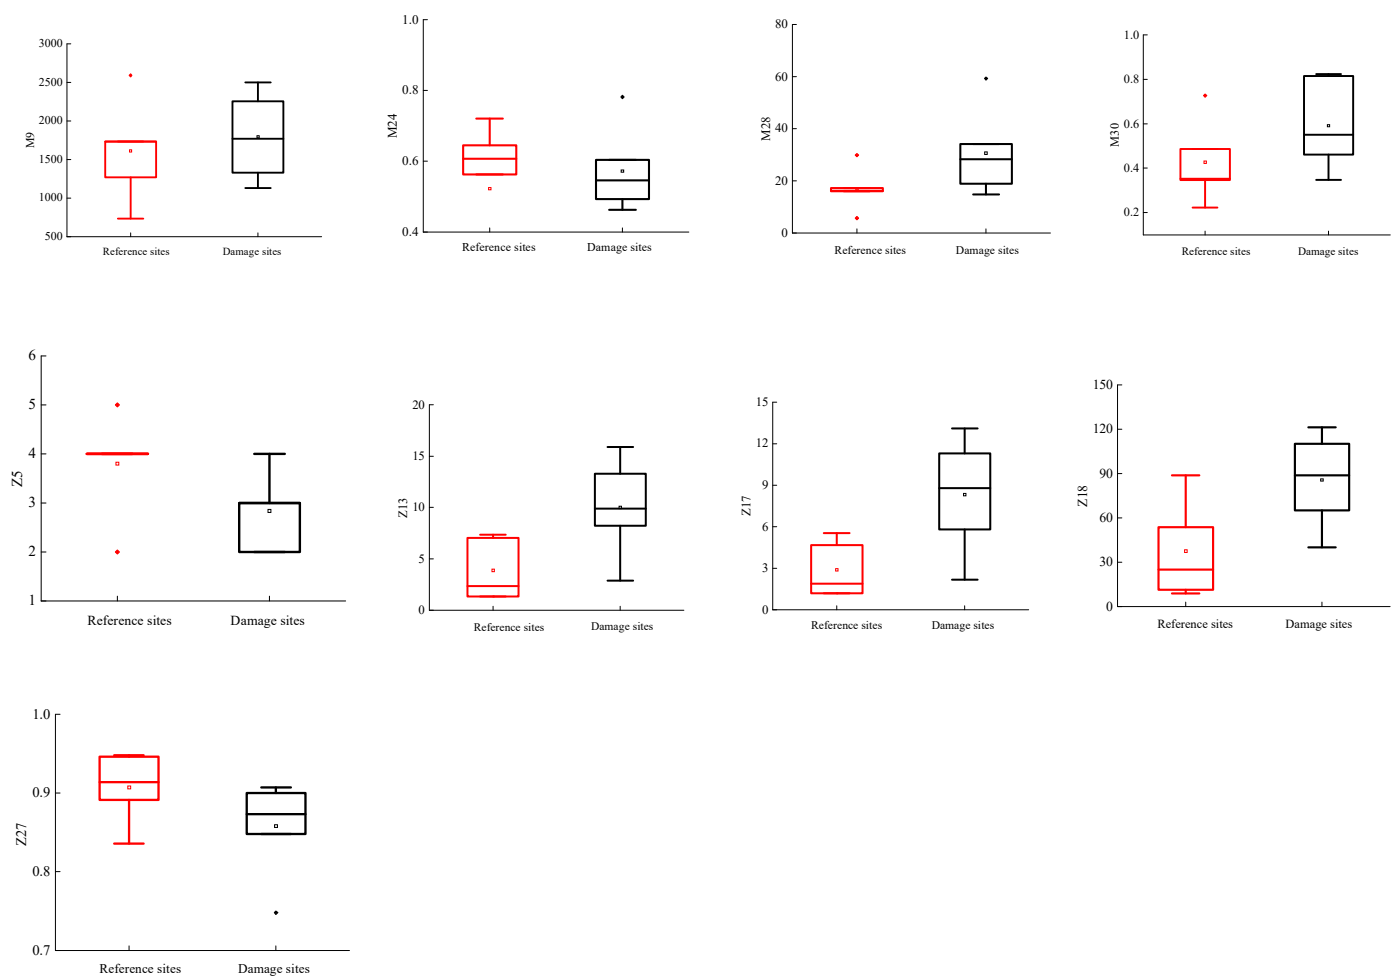

Figure S2 Box plot analysis during the dry season.
